# Supplementary material for: Phylogenetic Patterns of Geographical and Ecological Diversification in the Subgenus Drosophila
Source: PLoS One. 2012 Nov 12;7(11):e49552. doi: 10.1371/journal.pone.0049552 (PMC3495880; doi:10.1371/journal.pone.0049552)
Supplement: Table S1 — (XLSX) [file pone.0049552.s001.xlsx]

## Sheet: Sheet1
Table 1 Supplemental. Species and accession numbers used for the recosntruction of the Drosophila subgenus radiations phylogeny.
Species group	Species	Adh (1-711)	ND2 (712-1734)	COI (1735-3234)
polychaeta	D. asper	DQ471619	DQ471474	DQ471545
	D. daruma	DQ471618	DQ471473	DQ471544
	D. latifshahi	DQ471634	DQ471490	DQ471561
	D. hirtipes	-	DQ471489	DQ471560
	D. polychaeta	DQ471629	DQ471484	DQ471555
	D. polychaeta X	DQ471626	DQ471481	DQ471552
angor	D. angor	DQ471638	DQ471495	DQ471566
	D. angor A	DQ471612	DQ471456	DQ471538
	D. angor B	DQ471613	DQ471468	DQ471539
	D. angor C	DQ471614	DQ471469	DQ471540
	D. angor E	DQ471615	DQ471470	DQ471541
	D. hei	DQ471622	DQ471477	DQ471548
	D. velox	DQ471637	DQ471494	DQ471565
quadrisetata	D. barutani	DQ471642	DQ471504	DQ471576
	D. beppui	DQ471645	DQ471509	DQ471582
	D. karakasa	DQ471649	DQ471514	DQ471587
	D. multidentata	DQ471624	DQ471479	DQ471550
	D. perlucida	DQ471625	DQ471480	DQ471551
	D. pilosa	-	DQ471491	DQ471562
	D. potamophila	-	DQ471512	DQ471585
	D. quadrisetata	DQ471635	DQ471492	DQ471563
	D. sp T	DQ471636	DQ471493	DQ471564
	D. sp IZU	-	DQ471465	DQ471534
robusta (lacertosa)	D. bai	DQ471647	DQ471511	DQ471584
	D. lacertosa	DQ471652	DQ471517	DQ471590
	D. medioconstricta	DQ471640	DQ471502	DQ471574
	D. yunnanensis	DQ471650	DQ471515	DQ471588
robusta (okadai)	D. gani	AY750142	AY750073	AY750103
	D. bipatita	DQ471646	DQ471510	DQ471583
	D. neokadai	DQ471641	DQ471503	DQ471575
	D. okadai	AY750136	AY750080	AY750110
	D. unimaculata	AY750140	AY750084	AY750114
robusta (robusta)	D. pseudosordidula	AY750137	AY750081	AY750111
	D. robusta	AY750138	AY750082	AY750112
	D. sordidula	AY750139	AY750083	AY750113
	D. borusta	-	DQ471521	DQ471594
	D. cf cheda	DQ471609	DQ471467	DQ471536
melanica	D. colorata	-	-	EU390724
	D. euronotus	AY750132	-	EU390738
	D. longiserrata	AY750117	AY750057	AY750091
	D. melanica	AY750123	AY750064	AY750094
	D. micromelanica	AY750124	AY750065	AY750096
	D. moriwakii	AY750125	AY750066	AY750097
	D. nigromelanica	-	-	EU390739
	D. paramelanica	AY750127	AY750068	AY750099
	D. tsigana	AY750121	AY750058	AY750092
repleta (fasciola)	D. ellisoni	-	DQ202092	DQ202052
repleta (hydei)	D. eohydei	DQ471659	DQ471528	DQ471601
	D. hydei	DQ471660	DQ471529	DQ471602
	D. guayllabambae	-	-	DQ437706
	D. bifurca	-	-	AF145887
	D. nigrohydei	-	-	AF145886
	D. novemaristata	-	-	DQ437707
repleta (mercatorum)	D. mercatorum	DQ471664	DQ471460	DQ471607
repleta (mulleri)	D. borborema	-	-	AF146158
	D. buzzatii	M62743	DQ202091	AF146157
	D. serido	-	-	AF146160
	D. anceps	DQ471656	DQ471525	DQ471598
	D. eremophila	-	DQ202093	DQ202053
	D. hamatofila	-	DQ202094	AF146164/DQ202054
	D. hexastigma	-	DQ202096	DQ202055
	D. mainlandi	-	DQ202106	DQ202066
	D. meridionalis	-	DQ202110	DQ202070
	D. mettleri	M57300	-	AY533812
	D. micromettleri	-	-	EU659106
	D. nigrospiracula	-	DQ202114	AY533822/DQ202074
	D. pachuca	-	DQ202118	DQ202078
	D. propachuca	-	DQ202121	DQ202081
	D. richardsoni	-	-	AF146163
	D. spenceri	-	DQ202127	DQ202087
	D. starmeri	-	-	AF146153
	D. venezolana	-	DQ202129	AF146154/DQ202089
	D. huckinsi	-	DQ202097	DQ202057
	D. huichole	-	DQ202098	DQ202058
	D. longicornis	-	DQ202102	DQ202062
	D. martensis	-	-	AF146156
	D. mayaguana	M62742	DQ202107	DQ202067
	D. meridiana	-	DQ202109	DQ202069
	D. arizonae	M62741	EU341707	DQ383684/EU341676
	D. mojavensis	AY364493	D. moj genome	D. moj genome
	D. navojoa	AY156525	EU341709	EU493609
	D. aldrichi	-	EU341696	EU341661
	D. huaylasi	-	-	DQ383667
	D. mulleri	X03048	DQ202112	DQ202072
	D. nigrodumosa	-	EU341710	EU341679
	D. wheeleri	M62851	EU341705	EU341685
	D. ritae	-	DQ202122	DQ202082
	D. stalkeri	-	DQ202128	AF146162/DQ202088
repleta (repleta)	D. neorepleta	-	DQ202113	DQ202073
	D. repleta	DQ471667	DQ471464	DQ471533
virilis	D. virilis	U26846	DQ471505	DQ471577
	D. kanekoi	JF710263	DQ471518	DQ471591
	D. littoralis	DQ471662	DQ471458	DQ471605
	D. ezoana	DQ471658	DQ471527	DQ471600
	D. montana	U26842	DQ471461	DQ471608
	D. borealis w	JF710264	-	-
	D. flavomontana	U26838	-	-
	D. lacicola	U26841	-	-
	D. borealis e	U26839	-	EU390720
	D. americana	U26837	DQ471524	DQ471597
	D. lummei	U26843	DQ471459	DQ471606
	D. novamexicana	D.Nurminsky	-	-
annulimana	D. aracataca	DQ471657	DQ471526	DQ471599
	D. gibberosa	-	EU493466	-
nannoptera	D. acanthoptera	-	DQ202090	EU493598
	D. nannoptera	DQ471666	DQ471462	DQ471531
	D. pachea	-	DQ202115	AY533788/DQ202075
unclassified	D. fluvialis	DQ471633	DQ471488	DQ471559
	D. spng188	-	DQ471522	DQ471595
	D. cleftalike	-	DQ471523	DQ471596
	D. clefta	-	DQ471507	DQ471580
calloptera	D. atrata	-	-	EF569988
	D. ornatipennis	AY081443	EU493467/EU493573	EU493573
	D. schildi	-	-	EF570016
canalinea	D. canalinea	-	EU493469/EU493575	EU493575
	D. endobranchia	EU490429	-	-
cardini (cardini)	D. belladunni	AY695385	-	-
	D. cardini	AY695386	EU493576	EF569991
	D. cardinoides	-	-	EF569992
	D. neocardini	-	-	EF570006
	D. polymorpha	-	-	EF570014
cardini (dunni)	D. antillea	AY695383	-	-
	D. caribiana	AY695387	-	-
dreyfusi	D. camargoi	-	EU493578	EU493578
funebris	D. funebris	Y17611	EU493471/EU493579	EU390731/EU493579
guarani (guaramunu)	D. griseolineata	-	EU493472	EF569995
	D. guaraja	-	-	EF569996
	D. maculifrons	-	-	EF569998
guarani (guarani)	D. guaru	-	-	EF569997
	D. ornatifrons	AY081439	EU493473	EF570009
guttifera (quinaria?)	D. guttifera	AB261139	EU493494/EU493604	EU493604
immigrans (curviceps)	D. curviceps	AY044121	-	-
	D. oritisa	AY044123	-	-
immigrans (hypocausta)	D. hypocausta	AB261133	EU493476/EU493585	EU493585
	D. neohypocausta	AB261134	EU493481/EU493590	EU493590
	D. pararubida	-	EU493482	EU493591
	D. rubida	-	EU493484/EU493593	EU493593
	D. siamana	AB261135	-	-
immigrans (immigrans)	D. formosana	AB261131	-	-
	D. immigrans	M97638	EU493477	EF570021
	D. ruberrima	AB261132	-	-
	D. signata	-	EU493485	EU493594
immigrans (nasuto)	D. albomicans	AB033642	EU493475/EU493584	EU493584
	D. kepulauana	-	EU493478/EU493587	EU493587
	D. kohkoa	AY044124	EU493479	EU493588
	D. neonasuta	AB261138	-	AY633552
	D. pallidifrons	AB261136	-	-
	D. pulaua	-	EU493483/EU493592	EU493592
	D. sulfurigaster	-	EU493487	EU493596
immigrans (quadrilineata)	D. annulipes	AB261129	-	-
	D. quadrilineata	AB261130	-	-
macroptera	D. macroptera	-	EU493488/EU493597	EU493597
mesophragmatica	D. brncici	EF560573	-	-
	D. gasici	EF560576	-	-
	D. gaucha	EF560579	-	EU390733
	D. mesophragmatica	EF560577	-	-
	D. pavani	EF560580	EU493474/EU493583	EU493583
	D. viracochi	EF560578	-	-
pallidipennis	D. pallidipennis	-	EU493490/EU493600	EF570011
quinaria	D. brachynephros	AB033644	-	AF519382
	D. falleni	-	-	AY541136
	D. innubila	-	-	AY541211
	D. kuntzei	AF399012	-	AF519390
	D. quinaria	-	EU493495	AY154400
	D. recens	-	-	AY154456
	D. subquinaria	-	-	AY154423
sticta	D. sticta	-	-	EF570018
testacea	D. putrida	-	EU493504/EU493615	EU493615
tripunctata	D. nappae	-	-	EF570005
	D. neoguaramunu	-	-	EF570007
	D. setula	-	-	EF570022
	D. cuaso	-	-	EF569993
	D. medioimpressa	-	-	EF569999
	D. mediopunctata	-	-	EF570001
	D. mediosignata	-	-	EF570002
	D. paraguayensis	-	-	EF570012
	D. roehrae	-	-	EF570015
	D. unipunctata	-	EU493509	EF570020
	D. bandeirantorum	-	-	EF569989
	D. bifilum	-	-	EF569990
	D. frotapessoai	-	-	EF569994
	D. mediopicta	-	-	EF570000
	D. mediopictoides	-	EU493506	EU493617
	D. mediostriata	-	EU493507	EF570003
	D. nigricincta	-	-	EF570008
	D. paramediostriata	-	-	EF570013
	D. trifilum	-	-	EF570019
	D. mediodiffusa	-	EU493505	EU493616
	D. metzii	-	-	EF570004
	D. tripunctata	AY081440	EU493508	EF570023
Hawaiian
antopocerus (adunca)	D. adunca	AY006409	EU493520	EU493644
ateledrosophila	D. preapicula	-	HQ170901	HQ170790
haleakalae (anthrax)	D. melanoloma	-	EU493536	EU493662
haleakalae (cilifemorata)	D. nigra	M60793	EU493540	EU493667
haleakalae (fungiperda)	D. nigella	-	EU493539	EU493666
haleakalae (haleakalae)	D. haleakalae	-	EU493532	EU493656
mouthparts (ceratostoma)	D. nr humeralis	-	HQ170917	HQ170809
mouthparts (dissita)	D. dissita	-	HQ170876	HQ170763
mouthparts (fuscoamoeba)	D. aquila	-	HQ170864	HQ170754
mouthparts (hirtitarsus)	D. nr hirtitarsus	-	HQ170916	HQ170808
mouthparts (mimica)	D. mimica	M60792	EU493537	EU493664
mouthparts (mitchelli)	D. biseriata	-	EU493524/EU493648	EU493648
mouthparts (nanella)	D. nanella	-	HQ170895	HQ170782
mouthparts (quadrisetae)	D. nr residua	-	HQ170919	HQ170811
mouthparts (setiger)	D. desallei	-	HQ170875	HQ170762
tarsi (bristle tarsi)	D. apodasta	-	HQ170948	HQ170753
tarsi (split tarsi)	D. dasycnemia	U94208	HQ170933	HQ170823
tarsi (spoon tarsi)	D. percnosoma	-	EU493543	EU493670
nudidrosophila	D. kualapa	-	HQ170889	HQ170774
picture wing; adiastola (adiastola)	D. adiastola	M60791	-	-
picture wing; anomalipes	D. anomalipes	-	HQ170862	HQ170750
picture wing (grimshawi); glabriapex (glabriapex)	D. glabriapex	-	EU493531/EU493655	EU493655
picture wing (grimshawi); glabriapex (vesciseta)	D. micromyia	-	HQ170893	HQ170779
picture wing (grimshawi); grimshawi (grimshawi)	D. grimshawi	genome	BK006341	BK006341
picture wing; planitibia (cyrtoloma)	D. cyrtoloma	AY006418	HQ170874	HQ170761
picture wing; planitibia (picticornis)	D. picticornis	M63392	-	HQ170847
picture wing; planitibia (planitibia)	D. heteroneura	M63287	-	HQ170843
picture wing; primaeva (primaeva)	D. primaeva	AY006426	-	HQ170791
outgroups	D. melanogaster	M17833	genome	genome
	D. yakuba	X54120	X03240	X03240
	D. willistoni	genome	BK006338	BK006338
	D. pseudoobscura	genome	EF216235	EU493633
	D. ananassae	genome	BK006336	BK006336
