# Supplementary material for: Phylogenetic Patterns of Geographical and Ecological Diversification in the Subgenus Drosophila
Source: PLoS One. 2012 Nov 12;7(11):e49552. doi: 10.1371/journal.pone.0049552 (PMC3495880; doi:10.1371/journal.pone.0049552)
Supplement: Table S2 — (XLSX) [file pone.0049552.s002.xlsx]

## Sheet: Sheet1
Table 2 Supplemental. Species' ecology (1: fungus; 2: fruit; 3: sap; 4: flower; 5: cacti; 6: other) and geographic distribution (TaxoDros page - 1: Europe; 2: Africa; 3: Arabian Peninsula; 4: North America; 5: Central America; 6: Caribbean; 7: South America; 8: Asia; 9: Oceania; 10: Australia)
Species group	Species	Ecology	Geography
polychaeta	D. asper	2a	8
	D. daruma	2a, 3v	8
	D. latifshahi	2a	8
	D. hirtipes	2a	2 (+1 UK)
	D. polychaeta	2a	1, 2, 4, 5, 6, 7, 8, 9
	D. polychaeta X	2a	8
angor	D. angor	?	8
	D. angor A	?	8
	D. angor B	?	8
	D. angor C	?	8
	D. angor E	?	8
	D. hei	?	8
	D. velox	?	8
quadrisetata	D. barutani	?	8
	D. beppui	?	8
	D. karakasa	?	8
	D. multidentata	?	8
	D. perlucida	?	8
	D. pilosa	?	8
	D. potamophila	?	8
	D. quadrisetata	?	8
	D. sp T	?	8
	D. sp IZU	?	8
robusta (lacertosa)	D. bai	3abc	8
	D. lacertosa	3abc	8
	D. medioconstricta	3abc	8
	D. yunnanensis	3abc	8
robusta (okadai)	D. gani	3abc	8
	D. bipatita	3abc	8
	D. neokadai	3abc	8
	D. okadai	3abc	8
	D. unimaculata	3abc	1 (+8 Jp in 1957¿?)
robusta (robusta)	D. pseudosordidula	3abc	8
	D. robusta	3abc	2 (SA¿?), 4, 8 (Jp¿?)
	D. sordidula	3abc	8
	D. borusta	3abc	8
	D. cf cheda	3abc	8
	D. moriwakii	3abco	8
	D. colorata	3abc	4 (¿10?)
melanica	D. euronotus	3abc	4
	D. longiserrata	3abc	8
	D. melanica	3abc	4, 5 (¿Panama?)
	D. micromelanica	3abc	4
	D. nigromelanica	3abc	4
	D. paramelanica	3abc	4
	D. tsigana	3abc	1, 8
repleta (fasciola)	D. ellisoni	1, 2, 4, 5a,c,d	5, 7
repleta (hydei)	D. eohydei	1, 2, 4, 5a,c,d	5, 7
	D. hydei	1, 2, 4, 5a,c,d	1, 2, 3, 4, 5, 6, 7, 8, 9, 10
	D. guayllabambae	1, 2, 4, 5a,c,d	7, 2
	D. bifurca	1, 2, 4, 5a,c,d	4
	D. nigrohydei	1, 2, 4, 5a,c,d	4, 5, 7
	D. novemaristata	1, 2, 4, 5a,c,d	7
repleta (mercatorum)	D. mercatorum	1, 2, 4, 5a,c,d	1, 2, 4, 5, 7, 8, 9
repleta (mulleri)	D. borborema	5d	7
	D. buzzatii	5d	1, 2, 3, 4, 7, 8, 10
	D. serido	5d	7
	D. anceps	5d	4
	D. eremophila	5d	4
	D. hamatofila	5d	4
	D. hexastigma	5d	4
	D. mainlandi	5d	4
	D. meridionalis	5d	7
	D. mettleri	5d	4
	D. micromettleri	5d	6
	D. nigrospiracula	1g, 5d	4, 7
	D. pachuca	5d	4, 7
	D. propachuca	5d	4
	D. richardsoni	5d	6
	D. spenceri	5d	4
	D. starmeri	5d	5, 6
	D. venezolana	5d	5, 6
	D. huckinsi	5d	4
	D. huichole	5d	4
	D. longicornis	5d	4, 7
	D. martensis	5d	6, 7
	D. mayaguana	5d	6, 7
	D. meridiana	5d	4, 5, 7
	D. arizonae	5d	4, 5
	D. mojavensis	5d	4, 7
	D. navojoa	5d	4
	D. aldrichi	5d	4, 5, 7, 8, 10
	D. huaylasi	5d	7
	D. mulleri	5d	4, 5, 6, 7
	D. nigrodumosa	5d	7
	D. wheeleri	5d	4
	D. ritae	5d	4
	D. stalkeri	5d	4, 6
repleta (repleta)	D. neorepleta	1, 2, 4, 5a,c,d	4, 5, 7
	D. repleta	1, 2, 4, 5a,c,d	1, 2, 3, 4, 5, 6, 7, 8, 9, 10
virilis	D. virilis	3ac	1, 2, 4, 7, 8
	D. kanekoi	3ac	8
	D. littoralis	3ac	1, 8
	D. ezoana	3ac	1, 8
	D. montana	3ac	1, 4 (8 ¿Jp?)
	D. borealis w	3ac	4
	D. flavomontana	3ac	4
	D. lacicola	3ac	4
	D. borealis e	3ac	4
	D. americana	3ac	4
	D. lummei	3ac	1, 8
	D. novamexicana	3ac	4
annulimana	D. aracataca	2a	5, 7
	D. gibberosa	2a	4, 5, 7
nannoptera	D. acanthoptera	5ac	4, 7
	D. nannoptera	5ac	4
	D. pachea	5ac	4
unclassified	D. fluvialis	?	8
	D. spng188	?	8
	D. cleftalike	?	8
	D. clefta	?	8
calloptera	D. atrata	1m, 2, 4a,c,n	7
	D. ornatipennis	2, 4a,c,n	6
	D. schildi	2, 4a,c,n	5, 6, 7
canalinea	D. canalinea	2, 4a,c,n	4, 5, 6, 7
	D. endobranchia	2, 4a,c	6
cardini (cardini)	D. belladunni	2, 4a,c	6
	D. cardini	1l,m, 2, 4a,c	4, 5, 6, 7
	D. cardinoides	1m, 2, 4a,c	4, 5, 6, 7
	D. neocardini	1m, 2, 4a,c	7 (¿Mx?)
	D. polymorpha	2, 4a,c	6, 7 (¿4 Mx?)
cardini (dunni)	D. antillea	2, 4a,c	6
	D. caribiana	2, 4a,c	6
dreyfusi	D. camargoi	2, 4a,n	5, 7
funebris	D. funebris	1, 2a	1, 2, 3, 4, 6, 7, 8, 10
guarani (guaramunu)	D. griseolineata	1m, 2, 4n,c	7
	D. guaraja	2, 4n,c	7
	D. maculifrons	1m, 2, 4n,c	7
guarani (guarani)	D. guaru	2, 4n,c	7
	D. ornatifrons	2, 4n,c	7
guttifera (quinaria?)	D. guttifera	1	4
immigrans (curviceps)	D. curviceps	1, 3o	8
	D. oritisa	1, 2, 3	8
immigrans (hypocausta)	D. hypocausta	2ps	8, 9
	D. neohypocausta	2	8
	D. pararubida	2r	8, 9, 10
	D. rubida	2q	9, 10
	D. siamana	2s	8
immigrans (immigrans)	D. formosana	2s	8
	D. immigrans	1m, 2fs	1, 2, 3, 4, 5, 7, 8, 9, 10
	D. ruberrima	1, 2, 3	8
	D. signata	1, 2, 3	8
immigrans (nasuto)	D. albomicans	2, 3s	8, 9
	D. kepulauana	2	8, 9
	D. kohkoa	2s	8, 9, 10
	D. neonasuta	2	8
	D. pallidifrons	2	7, 9
	D. pulaua	2	8
	D. sulfurigaster	2s	4, 8, 9, 10
immigrans (quadrilineata)	D. annulipes	2	8
	D. quadrilineata	2, 6s	8, 9
macroptera	D. macroptera	1g	4
mesophragmatica	D. brncici	5c	7
	D. gasici	5c	7
	D. gaucha	1, 2, 4, 5e	7
	D. mesophragmatica	5c	7
	D. pavani	1, 2, 4, 5e	7
	D. viracochi	5c	7
pallidipennis	D. pallidipennis	?	5, 7
quinaria	D. brachynephros	1b,g	8
	D. falleni	1b,g,h	4
	D. innubila	1b,j	4
	D. kuntzei	1b,g	1, 8
	D. quinaria	2h, 6i	4
	D. recens	1b,g,h,k	4
	D. subquinaria	1b,k	4
sticta	D. sticta	2, 4a	5, 7
testacea	D. putrida	1a,b,g,h	4
tripunctata	D. nappae	1m, 2	7
	D. neoguaramunu	2, 4	5, 7
	D. setula	2, 4	5, 6, 7
	D. cuaso	1m, 2	7
	D. medioimpressa	2, 4	7
	D. mediopunctata	1m, 2, 4n	7, 5
	D. mediosignata	2, 4n	7
	D. paraguayensis	1m, 2	5, 7
	D. roehrae	1m, 2, 4u	5, 7
	D. unipunctata	2, 4u	4, 5, 7
	D. bandeirantorum	2, 4	7
	D. bifilum	2,4u	7
	D. frotapessoai	2, 4	7
	D. mediopicta	2, 4u	5, 7
	D. mediopictoides	2, 4u	5, 7
	D. mediostriata	2, 4n	5, 6, 7
	D. nigricincta	2, 4	5, 7
	D. paramediostriata	2, 4	5, 6, 7
	D. trifilum	2, 4	7
	D. mediodiffusa	2	6
	D. metzii	2, 4u	5, 6, 7
	D. tripunctata	1h, 2t	1, 4, 7, 8
Hawaiian
antopocerus (adunca)	D. adunca		4
ateledrosophila	D. preapicula		4
haleakalae (anthrax)	D. melanoloma		4
haleakalae (cilifemorata)	D. nigra		4
haleakalae (fungiperda)	D. nigella		4
haleakalae (haleakalae)	D. haleakalae		4
mouthparts (ceratostoma)	D. nr humeralis		4
mouthparts (dissita)	D. dissita		4
mouthparts (fuscoamoeba)	D. aquila		4
mouthparts (hirtitarsus)	D. nr hirtitarsus		4
mouthparts (mimica)	D. mimica		4
mouthparts (mitchelli)	D. biseriata		4
mouthparts (nanella)	D. nanella		4
mouthparts (quadrisetae)	D. nr residua		4
mouthparts (setiger)	D. desallei		4
tarsi (bristle tarsi)	D. apodasta		4
tarsi (split tarsi)	D. dasycnemia		4
tarsi (spoon tarsi)	D. percnosoma		4
nudidrosophila	D. kualapa		4
picture wing; adiastola (adiastola)	D. adiastola		4
picture wing; anomalipes	D. anomalipes		4
picture wing (grimshawi); glabriapex (glabriapex)	D. glabriapex		4
picture wing (grimshawi); glabriapex (vesciseta)	D. micromyia		4
picture wing (grimshawi); grimshawi (grimshawi)	D. grimshawi		4
picture wing; planitibia (cyrtoloma)	D. cyrtoloma		4
picture wing; planitibia (picticornis)	D. picticornis		4
picture wing; planitibia (planitibia)	D. heteroneura		4
picture wing; primaeva (primaeva)	D. primaeva		4
outgroups	D. melanogaster		1, 2, 3, 4, 5, 6, 7, 8, 9, 10
	D. yakuba		2
	D. willistoni		1, 2, 4, 5, 6, 7
	D. pseudoobscura		4, 5, 7, 10
	D. ananassae		1, 2, 4, 5, 6, 7, 8, 9, 10
a - Throckmorton, LH. 1975. The phylogeny, ecology and geography of Drosophila. In: RC King, editor. Handbook of Genetics. New York: Plenum Publishing Corporation. p. 421-469.
b - Markow, TA, P O'Grady. 2006. Drosophila: A guide to species identification and use. London: Academic Press (Elsevier).
c - Markow, TA, P O'Grady. 2008. Reproductive ecology of Drosophila. Funct. Ecol. 22:747-759.
d - Silva-Bernardi, ECC, AC Morales, FM Sene, MH Manfrin. 2006. Phylogenetic relationships in the Drosophila fasciola species subgroup (Diptera, Drosophilidae) inferred from partial sequences of the mitochondrial cytochrome oxidase subunit I (COI) gene. Genet. Mol. Biol. 29:566-571.
e - Godoy-Herrera, R, B Burnet, K Connolly 2006. Hybrid disadvantage in the larval foraging behaviour of the two neotropical species of Drosophila pavani and Drosophila gaucha. Genetica 124:33-40
f - Kimura, MT. 1980 Evolution of food preferences in fungus-feeding Drosophila: an ecological study. Evolution, 34: 1009-1018
g - Jaenike, J, SJ Perlman. 2002. Ecology and Evolution of host-parasite associations: mycophagous Drosophila and their parasitic nematodes. American Naturalist, 160 (Suppl): S23-S39
h - Werren & Jaenike (1995). Wolbachia and cytoplasmic incompatibility in mycophagous Drosophila and their relatives. Heredity, 75: 320-326
i - Jaenike, J. 1985. Parasite pressure and the evolution of amanitin tolerance in Drosophila. Evolution, 39: 1295-1301
j - Sullivan, J, J Jaenike. 2006. Male-killing Wolbachia and male mate choice: a test with Drosophila innubila. Evolutionary Ecology Research, 8: 91-102
k - Shoemaker, DDW, V Katju, J Jaenike. 1999. Wolbachia and the evolution of reproductive isolation between D. recens and D. subquinaria. Evolution, 53: 1157-1164
l - Perlman, SJ, J Jaenike. 2003. Infection success in novel hosts: an experimental and phylogenetic study of Drosophila-parasitic nematodes. Evolution 57: 544-557
m - Gottschalk, MS, L Bizzo, JS Döge, MS Profes, PRP Hofmann, VLS Valentel. 2009. Drosophilidae (Diptera) associated to fungi: differential use of resources in anthropic and Atlantic rain forest areas. Iheringia, Série Zoologica, 99: 442-448
n - Dobzhansky, T, C Pavan. 1950. Local and seasonal variations in relative frequencies of species of Drosophila in Brazil. J. Anim. Ecol, 19: 1-14
o - Okada, T, H Kurokawa. 1957. New or little known species of Drosophilidae of Japan. Kontyu 25: 2-12.
p - Okada, T, HL Carson. 1982. Drosophilidae associated with flowers in Papua New Guinea: III. Zingiberales. Kontyu 50: 396-410
q - Bock, IR. 1977. Notes on the Drosophilidae (Diptera) of Townsville, queensland, including four new Australian species records. J. Aust. Ent. Soc. 16: 267-272
r - Mather, WB. 1961. D. pararubida: A new species of Drosophila from New Guinea. The University of Queensland Papers, vol. I No. 11. St. Lucia: The University of Queensland Press.
s - Toda, MJ. 1986. Drosophilidae (Diptera) in Burma. II. The Drosophila immigrans species-group of the subgenus Drosophila. Kontyu 54: 634-653
t - Jaenike, J, D Grimaldi. 1983. Genetic viariation for host preference within and among populations of Drosophila tripunctata. Evolution 37: 1023-1033
u - Pipkin, SB, WB Heed. 1964. Nine new species of the D. tripunctata species group. Pacific Insects, 6: 256-273
v - Watabe, H, K Ohtani. 2006. A new method for culturing Drosophila. Journal Hokkaido Unversity of Education (Natural Sciences), 57(1): 41-47
